# Supplementary material for: Effects of plastic film mulching on the spatiotemporal distribution of soil water, temperature, and photosynthetic active radiation in a cotton field
Source: PeerJ. 2022 Sep 1;10:e13894. doi: 10.7717/peerj.13894 (PMC9441137; doi:10.7717/peerj.13894)
Supplement: Supplemental Information 1 [file peerj-10-13894-s001.xlsx]

## Sheet: Figure 2
	2018						2019
	M			NM			M			NM
	1	2	3	1	2	3	1	2	3	1	2	3
1	0.157982	0.157878	0.158393	0.147289	0.147122	0.144297	0.198415	0.198913	0.199396	0.193792	0.194088	0.194407
2	0.157845	0.157802	0.157935	0.147678	0.147481	0.147443	0.198323	0.198349	0.198306	0.193305	0.193424	0.193549
3	0.157496	0.157608	0.157683	0.147754	0.147767	0.147794	0.1972	0.197545	0.19802	0.192302	0.192667	0.193086
4	0.157424	0.157463	0.157439	0.148217	0.148156	0.147975	0.19687	0.19698	0.19709	0.191447	0.19168	0.192048
5	0.15696	0.157178	0.157227	0.148399	0.148415	0.148317	0.19654	0.19665	0.19676	0.190186	0.190689	0.191085
6	0.156257	0.156525	0.156677	0.148211	0.148205	0.14829	0.195274	0.19632	0.19643	0.188565	0.189238	0.189738
7	0.154709	0.155349	0.155794	0.148066	0.148185	0.148232	0.193829	0.194616	0.195061	0.186467	0.187235	0.187897
8	0.153469	0.154061	0.154369	0.147767	0.147871	0.147892	0.194548	0.194662	0.194426	0.18478	0.185375	0.185852
9	0.152667	0.15281	0.152835	0.14725	0.147237	0.147488	0.274737	0.19536	0.193823	0.187444	0.183845	0.184249
10	0.150275	0.151204	0.151937	0.146701	0.14707	0.147213	0.236923	0.244139	0.255406	0.191926	0.191556	0.190125
11	0.149571	0.149801	0.149569	0.146276	0.146356	0.146398	0.223281	0.227356	0.231722	0.190292	0.191029	0.191591
12	0.202077	0.206641	0.196422	0.156727	0.155878	0.151315	0.225203	0.217315	0.220054	0.188241	0.188628	0.189451
13	0.190637	0.194015	0.197687	0.154595	0.155506	0.15623	0.257815	0.268537	0.28927	0.192736	0.192146	0.190648
14	0.182428	0.18477	0.187588	0.151814	0.152676	0.153632	0.239651	0.244533	0.25027	0.191377	0.192092	0.192553
15	0.176411	0.178851	0.180736	0.14925	0.150273	0.151027	0.228091	0.231708	0.235347	0.188511	0.189612	0.190587
16	0.217532	0.222695	0.213217	0.15682	0.156047	0.151623	0.231446	0.22107	0.224554	0.184401	0.185722	0.18722
17	0.207776	0.210642	0.213977	0.154864	0.155475	0.1564	0.241924	0.250001	0.262721	0.185931	0.185713	0.185268
18	0.197941	0.201501	0.204722				0.227129	0.231318	0.235755	0.184605	0.185163	0.18568
19	0.18866	0.191399	0.194268				0.240852	0.221413	0.22484	0.184194	0.183005	0.184003
20	0.229365	0.199108	0.185345				0.22802	0.232448	0.237585	0.186653	0.186542	0.185684
21	0.212963	0.216435	0.218416				0.215204	0.219608	0.223941	0.185015	0.185668	0.186386
22	0.221923	0.20614	0.209513				0.233206	0.223407	0.211701	0.185576	0.183684	0.182846
23	0.224346	0.228247	0.236462				0.218898	0.22349	0.228188	0.186698	0.186896	0.186545
24	0.216741	0.218595	0.221002				0.205274	0.209085	0.213932	0.184127	0.185164	0.186033
25	0.226173	0.213476	0.214887				0.229423	0.234603	0.23124	0.190027	0.188642	0.185999
26	0.219246	0.221491	0.225142				0.217243	0.221153	0.224912	0.19011	0.190531	0.190612
27	0.211638	0.214428	0.217087	0.152618	0.153488	0.153715	0.20742	0.211793	0.213999	0.187862	0.188781	0.189581
28	0.203255	0.206101	0.208891	0.149487	0.150623	0.151627	0.236519	0.228456	0.202829	0.19287	0.19145	0.186941
29	0.264227	0.222802	0.200589	0.154495	0.149187	0.148417	0.221068	0.225904	0.23027	0.19481	0.194904	0.194079
30	0.232191	0.238808	0.247838	0.157454	0.1579	0.15713	0.20997	0.21397	0.217066	0.193616	0.194016	0.194416
31	0.258491	0.221856	0.226789	0.156256	0.155577	0.156599	0.20597	0.20197	0.20597	0.195816	0.192816	0.193216
32	0.24879	0.257699	0.270506	0.159575	0.159805	0.15924	0.257516	0.257182	0.2351	0.198061	0.198066	0.198816
33	0.231974	0.2364	0.242183	0.156138	0.157279	0.158612	0.246095	0.25064	0.255801	0.196719	0.197559	0.198283
34	0.255148	0.250352	0.228179	0.156746	0.1551	0.155067	0.241844	0.243244	0.244644	0.195659	0.195048	0.1959
35	0.237254	0.240754	0.245977	0.157118	0.157203	0.157241	0.237644	0.239044	0.240444	0.196745	0.19691	0.196601
36	0.22989	0.232293	0.235728	0.155757	0.15629	0.156968	0.252628	0.256237	0.258369	0.19515	0.195845	0.196334
37	0.222623	0.2256	0.228261	0.153738	0.154625	0.155424	0.246672	0.24877	0.250745	0.19347	0.194075	0.194462
38	0.215159	0.217551	0.219886	0.151441	0.152251	0.152916	0.248243	0.25035	0.248353	0.193962	0.193783	0.193132
39	0.207515	0.210098	0.212637	0.148486	0.149493	0.150461	0.242243	0.244243	0.246243	0.193129	0.193432	0.193764
40	0.200669	0.202742	0.205226	0.145593	0.146553	0.147643	0.239276	0.241027	0.242038	0.191702	0.192259	0.192642
41	0.196549	0.197749	0.199134	0.143627	0.144243	0.144911	0.233848	0.23538	0.237212	0.189835	0.190471	0.191057
42	0.192723	0.193923	0.195194	0.141713	0.142215	0.142932	0.228676	0.230483	0.232244	0.187717	0.188432	0.189122

## Sheet: Figure 3
		Year 2018						Year 2019
		M			NM			M			NM
xx	yy	June 15	July 15	August 15	June 15	July 15	August 15	June 15	July 15	August 15	June 15	July 15	August 15
0	10	0.141	0.164	0.233	0.163	0.197	0.205	0.098697	0.250539	0.261753	0.186738	0.163477	0.165118
0	30	0.157	0.17	0.279	0.085	0.092	0.097	0.169604	0.232008	0.256519	0.174449	0.166754	0.171225
0	50	0.107	0.115	0.306	0.1	0.106	0.107	0.257177	0.234112	0.26402	0.215139	0.214038	0.214038
0	70	0.132	0.139	0.231	0.05	0.057	0.063	0.290117	0.287718	0.321373	0.0720504	0.0725369	0.0788258
0	90	0.061	0.094	0.237	0.075	0.082	0.087	0.169198	0.158519	0.184385	0.238976	0.240354	0.242413
0	110	0.125	0.263	0.26	0.098	0.102	0.11	0.287718	0.27763	0.284693	0.13296	0.131648	0.135574
20	10	0.13	0.14	0.204	0.171	0.181	0.193	0.177253	0.258163	0.260778	0.205128	0.177253	0.174851
20	30	0.152	0.169	0.252	0.102	0.113	0.112	0.279178	0.253541	0.265308	0.24582	0.237939	0.243439
20	50	0.072	0.074	0.309	0.098	0.103	0.107	0.177253	0.210719	0.27105	0.224199	0.221683	0.224557
20	70	0.145	0.156	0.254	0.069	0.077	0.08	0.284693	0.280103	0.303578	0.125482	0.124595	0.132523
20	90	0.111	0.174	0.194	0.089	0.095	0.098	0.191795	0.180436	0.205503	0.207373	0.208491	0.211459
20	110	0.178	0.275	0.277	0.134	0.139	0.149	0.228832	0.213671	0.21806	0.111571	0.111571	0.116998
40	10	0.148	0.17	0.276	0.181	0.186	0.194	0.319206	0.252543	0.256519	0.189468	0.176853	0.189079
40	30	0.187	0.196	0.283	0.081	0.088	0.085	0.277319	0.251876	0.263697	0.282865	0.270099	0.280411
40	50	0.106	0.177	0.31	0.127	0.133	0.13	0.224915	0.209235	0.254536	0.275763	0.273571	0.275763
40	70	0.111	0.169	0.233	0.052	0.058	0.056	0.27105	0.286209	0.323791	0.161417	0.158519	0.169604
40	90	0.1	0.204	0.211	0.057	0.064	0.067	0.199083	0.174449	0.203625	0.225273	0.225273	0.228832
40	110	0.155	0.291	0.291	0.072	0.079	0.094	0.267872	0.273257	0.273885	0.145048	0.14291	0.150142
60	10				0.133	0.144	0.155	0.251208	0.212198	0.217696	0.179245	0.165118	0.192953
60	30	0.145	0.169	0.343	0.118	0.125	0.125	0.307279	0.245141	0.276697	0.262402	0.251876	0.266912
60	50	0.134	0.222	0.279	0.072	0.079	0.077	0.280719	0.256519	0.284085	0.136443	0.127251	0.13904
60	70	0.128	0.201	0.265	0.1	0.11	0.109	0.285906	0.264665	0.294864	0.190633	0.190245	0.197177
60	90	0.091	0.112	0.244	0.098	0.107	0.107	0.206626	0.183598	0.200223	0.182415	0.18202	0.185171
60	110	0.136	0.25	0.251	0.139	0.144	0.159	0.284997	0.274825	0.274825	0.0807476	0.0778626	0.085049
80	10	0.13	0.187	0.22	0.133	0.159	0.176	0.230952	0.232359	0.254867	0.16757	0.16183	0.176053
80	30	0.17	0.198	0.221	0.109	0.117	0.121	0.233061	0.156855	0.232359	0.17284	0.161417	0.175252
80	50	0.136	0.257	0.298	0.082	0.089	0.09	0.187129	0.200981	0.235508	0.0958997	0.0836187	0.103329
80	70	0.208	0.214	0.316	0.052	0.06	0.063	0.280103	0.29398	0.3007	0.229894	0.229894	0.231304
80	90	0.094	0.112	0.241	0.09	0.097	0.099	0.185955	0.158103	0.173242	0.162654	0.161417	0.164709
80	110	0.154	0.265	0.258	0.143	0.151	0.155	0.297796	0.290715	0.290715	0.10609

## Sheet: Figure 4
		Year 2018						Year 2019
		M			NM			M			NM
x	y	June 15	July 15	August 15	June 15	July 15	August 15	June 15	July 15	August 15	June 15	July 15	August 15
0	10	25.8	22.9	22.4	24.8	22.8	21	25.2	25.1	23.4	23.9	23.9	20.5
0	30	25.9	22.8	21.4	24.5	23.5	22	25.1	24.4	23	24	24	20.4
0	50	24.7	22.5	21.2	23.1	22.6	21.6	23.8	23	22.1	22.8	23.1	20.2
0	70	22.7	21.9	20.9	20.3	20.9	20.5	22.1	21.9	21.5	21.7	22.6	20.2
0	90	21.3	21.2	20.4	19.8	20.8	20.5	20.2	20.6	20.6	20.6	21.7	20
0	110	20.2	20.6	20.1	19	20.2	20	19.1	19.9	20.2	19.1	20.7	19.5
20	10	26.6	23.3	23	25.5	23.2	21.1	24.8	24.9	23.3	22.8	22.7	19.8
20	30	25.8	22.8	21.6	24	23	21.7	25.1	24.4	23	23.8	23.7	20.4
20	50	24.9	22.6	21.2	23.1	22.6	21.6	23.7	23	22.1	22.8	23	20.2
20	70	22.5	21.7	20.7	20.7	21.2	20.7	21.5	21.6	21.1	21.5	22.2	20
20	90	21.4	21.3	20.6	19.8	20.7	20.4	20.2	20.7	20.7	20.7	21.8	20.1
20	110	19.9	20.4	20	19.2	20.4	20.3	18.8	19.8	20.2	19.3	20.6	19.4
40	10	26.7	23.2	23	25.7	23.2	21	24.8	24.9	23.1	22.4	22.6	19.6
40	30	26.3	23.1	21.7	24.2	23.2	21.8	24.6	23.8	22.5	23.8	23.8	20.4
40	50	24.5	22.6	21.2	23.2	22.7	21.6	23.8	23.2	22.1	22.7	23	20.2
40	70	23	22.2	21.2	21.3	21.7	21.1	21.7	21.7	21.2	21.5	22.2	20
40	90	21.3	21.1	20.4	19.9	20.8	20.5	20.1	20.7	20.6	20.6	21.5	19.8
40	110	20	20.5	20	19	20	20	18.6	19.7	19.9	19.4	20.7	19.6
60	10				25.3	23.4	20.9	24.8	25	23.2	22.1	22.2	19.6
60	30	26	22.7	21.3	24	23	21.7	24.7	24.3	22.7	23.9	24	20.8
60	50	24.6	22.5	21.2	23.1	22.6	21.6	23.5	23.2	22.2	23	23.3	20.5
60	70	22.3	21.6	20.6	21.3	21.7	21.1	21.7	21.8	21.2	21.6	22.2	20
60	90	21.3	21.2	20.4	20.3	21	20.6	20	20.5	20.3	20.7	21.6	20
60	110	20	20.4	19.9	19	20.1	20	18.9	20	20.2	19.6	20.8	19.7
80	10	25.1	22.4	22	25.3	23	21	24.8	24.8	23	21.6	21.7	19.2
80	30	25.6	22.5	21.4	24.3	23.2	21.9	24.8	24.2	22.7	23.7	23.7	20.6
80	50	24.4	22.3	21.2	22.9	22.5	21.5	23.7	24.7	23	23.1	23.5	20.7
80	70	22.4	21.7	20.7	21.2	21.5	20.9	21.6	21.8	21.2	21.5	22.1	19.9
80	90	21.7	21.5	20.7	20.3	21	20.6	20.1	20.7	20.5	20.9	21.7	20.1
80	110	20.2	20.6	20.1	19.3	20.2	20.1	19.2	20.4		19.4	20.6	19.6

## Sheet: Figure 5
	M			NM
	1	2	3	1	2	3
2018-06-07	0.2	0.25	0.27	0.07	0.03	0.04
2018-06-19	0.39	0.52	0.47	0.1	0.14	0.13
2018-07-09	0.83	0.9	0.91	0.5	0.6	0.63
2018-07-18	0.96	0.93	0.98	0.82	0.88	0.84
2018-08-04	0.95	0.99	0.98	0.88	0.96	0.96
2018-08-15	0.98	0.95	0.96	0.87	0.95	0.93
2018-09-09	0.88	0.92	0.94	0.9	0.87	0.87
	M			NM
	1	2	3	1	2	3
2019-06-08	0.15	0.16	0.14	0.1	0.15	0.13
2019-06-17	0.42	0.5	0.48	0.2	0.34	0.25
2019-07-05	0.7	0.74	0.73	0.5	0.58	0.58
2019-07-30	0.92	0.88	0.95	0.88	0.82	0.85
2019-08-18	0.91	0.91	0.96	0.79	0.97	0.92
2019-09-01	0.9	0.9	0.95	0.85	0.94	0.95
2019-09-18	0.86	0.91	0.92	0.81	0.92	0.91

## Sheet: Figure 6
		Year 2018						Year 2019
		M			NM			M			NM
x	y	June 15	July 15	August 15	June 15	July 15	August 15	June 15	July 15	August 15	June 15	July 15	August 15
0	0	0.881386	0.98495	0.968432	0.305171	0.970775	0.974058	0.925432	0.942029	0.958893	0.906572	0.931481	0.921405
20	0	0.0712205	0.925231	0.966851	0	0.93975	0.920449	0.813187	0.961159	0.925692	0.191211	0.930864	0.883779
40	0	0.128468	0.958338	0.94316	0	0.843145	0.982156	0.230377	0.906667	0.857707	0.221694	0.232099	0.826087
60	0	0.800107	0.966014	0.985294	0.247994	0.886059	0.869232	0.232339	0.953044	0.760474	0.221299	0.895679	0.940635
80	0	0.91787	0.983723	0.960614	0.0603545	0.780736	0.932652	0.911303	0.976812	0.972332	0.891132	0.952469	0.955686
0	20	0.469816	0.970873	0.928854	0	0.960093	0.85973	0.533359	0.958261	0.932806	0.193191	0.423457	0.913044
20	20	0.0149251	0.976576	0.908909	0	0.737877	0.769333	0.209969	0.942029	0.894862	0.197546	0.890741	0.538462
40	20	0.2918	0.909706	0.903739	0	0.135115	0.813273	0.131083	0.908986	0.893281	0.123911	0.689506	0.857023
60	20	0.714901	0.923256	0.881938	0	0.820664	0.769306	0.235871	0.947246	0.914624	0.230008	0.865432	0.942308
80	20	0.488629	0.903292	0.958415		0.650325	0.832543	0.907771	0.942609	0.887747	0.270784	0.872222	0.896321
0	40	0.042216	0.908421	0.888529		0.954988	0.796224	0.242543	0.912464	0.844269		0.755556	0.83612
20	40	0	0.751747	0.888669		0.750118	0.745953	0.234694	0.914203	0.832411		0.830247	0.815217
40	40	0	0.842902	0.8586		0.486913	0.737179	0.0839874	0.865507	0.807115		0.0697531	0.45903
60	40	0.529026	0.80869	0.898318		0.795953	0.493372	0.220173	0.949565	0.808696		0.869753	0.876254
80	40	0.0142366	0.798184	0.894107		0.236751	0.406903	0.189953	0.914783	0.901186		0.929012	0.853679
0	60	0	0.662273	0.732483		0.481086	0.134397		0.866667	0.449012		0.0771605	0.689799
20	60	0	0.738739	0.823636		0.507484	0.376814		0.122899	0.795257		0.0234568	0.383779
40	60	0	0.729737	0.671984		0.245562	0.293289		0.330435	0.117787		0.281481	0.69398
60	60	0	0.849933	0.690585		0	0.102422		0.878261	0.207115		0.462346	0.738294
80	60		0.638795	0.688002			0.544622		0.782029	0.886166		0.737654	0.70903
0	80		0.436962	0.410183			0.181942		0.805217	0.0758893		0.0024691	0.0978261
20	80		0.962808	0.5693			0		0.104928	0.611067		0.0845679	0.0986622
40	80		0.741525	0.703385			0		0.143768	0.0774704		0.146914	0.126254
60	80		0.85336	0.762343			0		0.826087	0.119368		0.0790123	0.149666
80	80		0.0226367	0					0.774493	0.41502		0.0030864	0.218227
0	100		0	0					0	0.128854
20	100		0.0214138	0.0083724					0.177971	0.101976
40	100		0	0.0266361					0.017971	0
60	100		0.043172	0.427432					0.0202898	0.133597
80	100			0.0213251					0.0771015	0.0766798
0	120			0
20	120			0
40	120			0
60	120			0
80	120

## Sheet: Table 1
		Seedding stage									Budding stage									Flowering and Boll-forming stage									Boll-opening stage
Year	Soil depth(cm)	M			NM			M-NM			M			NM			M-NM			M			NM			M-NM			M			NM			M-NM
		1	2	3	1	2	3	1	2	3	1	2	3	1	2	3	1	2	3	1	2	3	1	2	3	1	2	3	1	2	3	1	2	3	1	2	3
2018	0-20	24.59	24.0279	24.2042	21.8183	21.1184	21.316	2.77167	2.90946	2.88822	26.6664	26.6428	26.4427	23.43	22.75	23.89	3.23635	3.89281	2.55271	22.2283	22.1506	22.2555	21.05	22.21	22.32	1.17827	-0.0593551	-0.064479	17.8005	17.9354	17.8701	17.6266	17.6827	17.6074	0.173886	0.252703	0.262661
	20-40	22.97	22.6644	22.5329	19.3933	19.2136	19.2892	3.57667	3.45077	3.24371	25.4818	25.4697	25.3423	22.9873	23.0837	23.1066	2.49453	2.38597	2.23573	21.8897	21.7629	21.8533	21.8312	21.5213	21.7095	0.0584896	0.241524	0.143767	18.02	17.9976	17.8757	18.3643	18.3289	18.1904	-0.34429	-0.331238	-0.314715
	40-60	21.3578	21.1813	21.2303	18.8332	18.6882	18.7598	2.52467	2.49305	2.4705	23.8932	23.9269	23.9192	22.1626	22.2626	22.3302	1.73065	1.66432	1.58905	21.5751	21.4698	21.513	21.4998	21.2673	21.4038	0.0752459	0.202512	0.10914	18.2637	18.258	18.1515	18.4641	18.4387	18.3179	-0.200399	-0.180738	-0.16631
	60-80	19.9548	19.8	19.9341	17.528	17.4224	17.5272	2.42683	2.3776	2.40692	22.2724	22.3313	22.3808	20.4425	20.5526	20.6501	1.82992	1.77873	1.73065	21.1204	21.045	21.0773	20.7103	20.5941	20.6742	0.410064	0.450917	0.40311	18.3245	18.3713	18.2801	18.5098	18.463	18.3634	-0.185239	-0.0916904	-0.0833091
	80-100	19.0643	18.9354	19.058	16.9793	16.9418	16.9938	2.085	1.99362	2.06422	21.207	21.2755	21.3385	19.6476	19.7588	19.8625	1.5594	1.5167	1.476	20.7338	20.6781	20.685	20.3733	20.2999	20.3611	0.36052	0.378179	0.323867	18.4064	18.46	18.3824	18.5815	18.5344	18.4471	-0.175122	-0.0744284	-0.064762
	100-120	17.9088	17.8206	17.9028	16.2363	16.1996	16.2624	1.6725	1.62102	1.64037	19.8498	19.9255	20.0016	18.7794	18.882	18.9879	1.07043	1.0435	1.01368	20.1321	20.131	20.1096	19.8998	19.8632	19.912	0.232393	0.267826	0.197583	18.3395	18.3767	18.3019	18.4405	18.4351	18.3554	-0.101021	-0.0584761	-0.0535242
2019	0-20	24.5072	24.7998	24.9627	22.355	22.4673	22.739	2.15217	2.3325	2.22367	24.7662	24.7763	24.8055	21.9227	22.1196	21.9489	2.8435	2.6567	2.8566	22.7203	22.5529	22.7035	21.7293	21.3829	21.7103	0.991048	1.16995	0.99325	17.2098	17.3431	17.185	16.4	16.3864	16.1293	0.8098	0.956667	1.05567
	20-40	22.298	22.5183	22.7167	20.6517	20.9317	21.11	1.64633	1.58667	1.60667	23.6088	23.5526	23.5738	21.6007	21.4977	21.6718	2.0081	2.0549	1.902	22.2658	22.1867	22.3102	21.6364	21.525	21.7076	0.629381	0.661667	0.6026	17.5247	17.6037	17.5406	16.9625	16.9129	16.8552	0.5622	0.690778	0.685333
	40-60	20.5688	20.7818	20.9985	19.76	20.0033	20.215	0.808833	0.7785	0.7835	22.5775	22.5604	22.5764	21.5854	21.293	21.7212	0.9921	1.2674	0.8552	21.895	21.8392	21.9562	21.7783	21.6978	21.7533	0.116762	0.141429	0.20285	17.5374	17.5746	17.5298	17.1413	17.0617	17.006	0.3961	0.512889	0.523778
	60-80	18.6638	18.8598	19.0665	17.9533	18.1517	18.3533	0.7105	0.708167	0.713167	21.0248	21.0427	21.0658	20.2286	20.1531	20.3556	0.7962	0.8896	0.7102	20.9412	20.9094	20.9857	21.0342	21.0174	21.0169	-0.0930476	-0.108	-0.0312001	17.5917	17.6022	17.5583	17.2655	17.1193	17.0639	0.3262	0.482889	0.494444
	80-100	17.173	17.357	17.547	16.6267	16.79	16.9983	0.546333	0.567	0.548667	19.7837	19.8327	19.867	19.2396	19.2497	19.4373	0.5441	0.583	0.4297	20.2277	20.2053	20.2617	20.6031	20.5212	20.6486	-0.375429	-0.315952	-0.38685	17.5239	17.527	17.4751	17.5136	17.4138	17.3621	0.0103002	0.113222	0.113
	100-120	16.1052	16.2712	16.4478	15.4	15.54	15.74	0.705167	0.731167	0.707833	18.9181	18.9843	19.0344	18.0444	18.0595	18.2196	0.8737	0.9248	0.8148	19.8179	19.8026	19.8403	19.84	19.7579	19.8764	-0.0221429	0.0446667	-0.0360001	17.7455	17.7481	17.6972	17.3764	17.4268	17.3748	0.3691	0.321333	0.322445
